# Supplementary material
Source: Springer Nature journal article supplement (https://www.springermedizin.de/resource/supplementary/12903_2014_472_MOESM2_ESM.pdf/9516764)

**■ Diagnostic & Clinical Treatment Activities** **■ Preventive Activities**

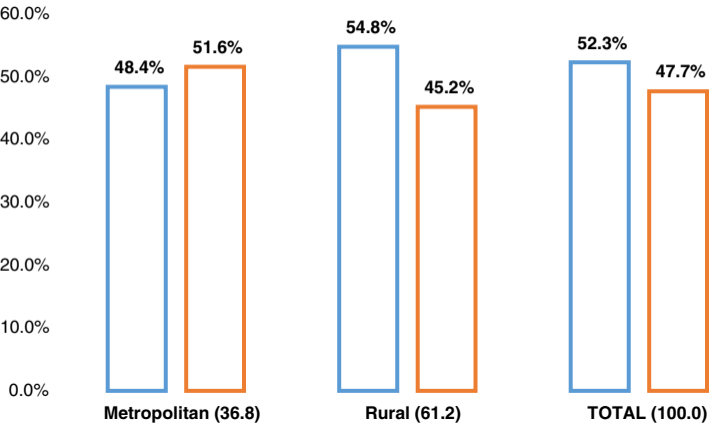

Supplement: MOESM2 [file 9516764]
